# Supplementary material
Source: Springer Nature journal article supplement (https://www.springermedizin.de/resource/supplementary/12987_2009_306_MOESM2_ESM.pdf/9611756)

# Evan's Ratios

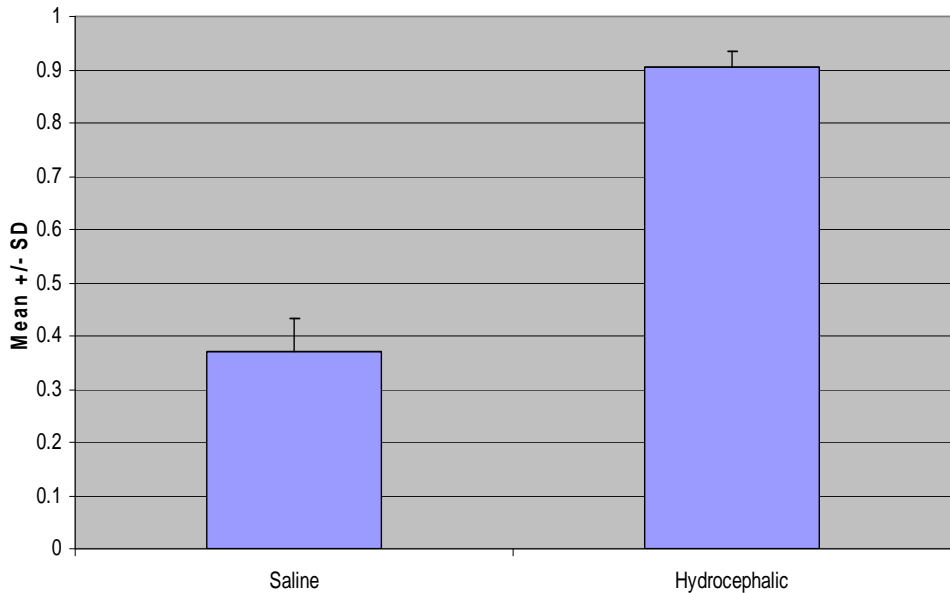

Supplement: MOESM2 [file 9611756]
